# Supplementary material
Source: publisher figshare collection journal article supplement (https://springernature.figshare.com/ndownloader/files/12565757)
Supplement: Supplementary file [file 12565757]

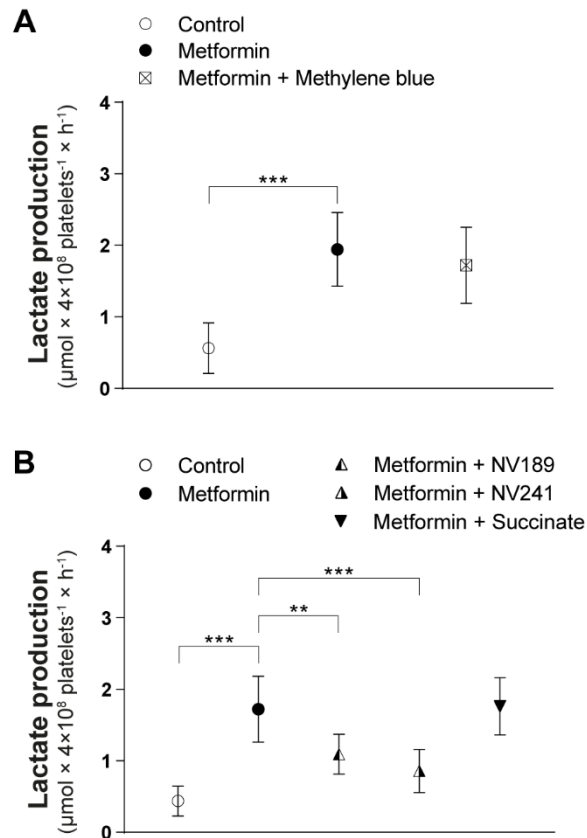

**Effect of methylene blue, NV189, NV241 and succinate on lactate production in metformin-intoxicated human platelets.** Lactate production of human platelets incubated with metformin (10 mM) was measured every 30 min over 4 h with or without co-treatment of **a**: methylene blue (1  $\mu\text{M}$ ) or **b**: NV189, NV241 or succinate (250  $\mu\text{M}$ ) every 30 min starting at 60 min. A vehicle control was run with each experiment (control). Data are expressed as mean  $\pm$  SD. All experiments were performed with n=7, with exception of the control and metformin group of the lactate production assay run with methylene blue (n=9) (a). One-way ANOVA with Dunnet *post hoc* test was used. \*\*p<0.01 and \*\*\*p< 0.001, compared to metformin.
